# Supplementary material for: Obstructive sleep apnea is related to alterations in fecal microbiome and impaired intestinal barrier function
Source: PubMed Central journal article supplement (PMC9841009; doi:10.1038/s41598-023-27784-0), 2023-01-15

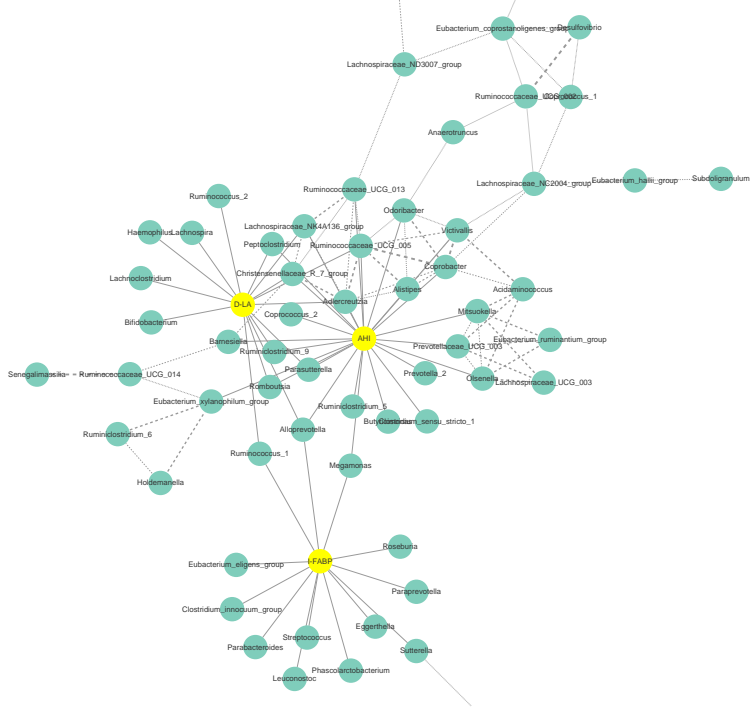

Supplement: 41598_2023_27784_MOESM3_ESM.pdf [file 41598_2023_27784_MOESM3_ESM.pdf]
